# Supplementary material for: Study of the layer thickness of multilayer sample by the LIBS method based on ablation rate correction
Source: Royal Society of Chemistry journal article supplement (doi:10.1039/d4ja00208c), 2024-01-01
Supplement: d4ja00208c1.pdf [file d4ja00208c1.pdf]

## Supplementary Information for Study of layer thickness of multilayer sample by LIBS method based on ablation rate correction

Shiming Liu, Cong Li\*, Qi He, Huace Wu, Xiaohan Hu, Boliang Men, Ding Wu, Ran Hai,  
Xingwei Wu and Hongbin Ding

Key Laboratory of Materials Modification by Laser, Ion, and Electron Beams (Ministry  
of Education), School of Physics, Dalian University of Technology, Dalian 116024,  
People's Republic of China

\*E-mail of the corresponding author: [cli@dlut.edu.cn](mailto:cli@dlut.edu.cn)

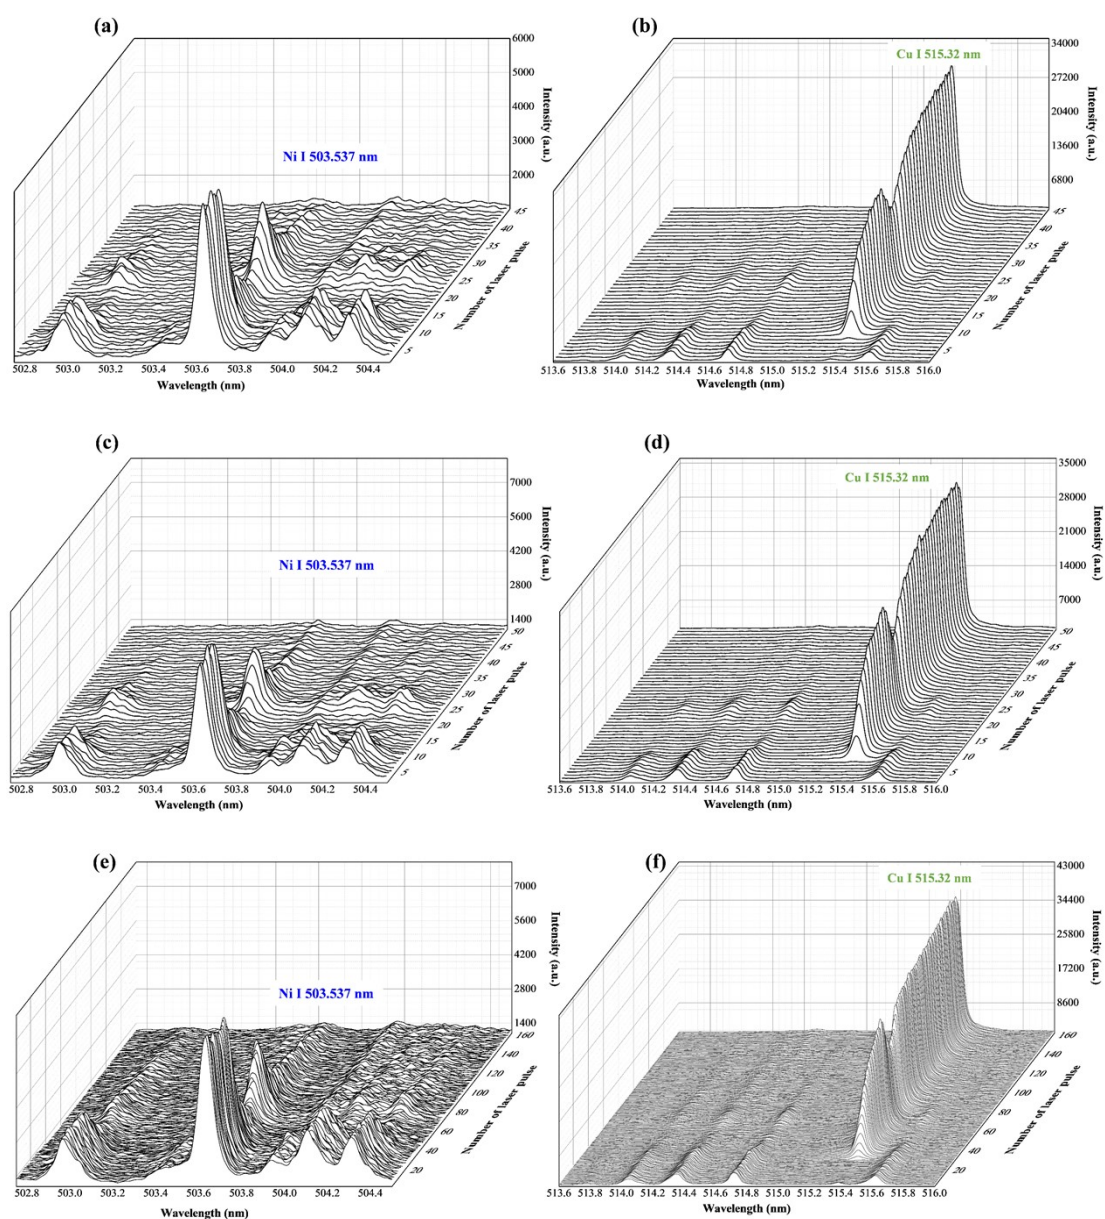

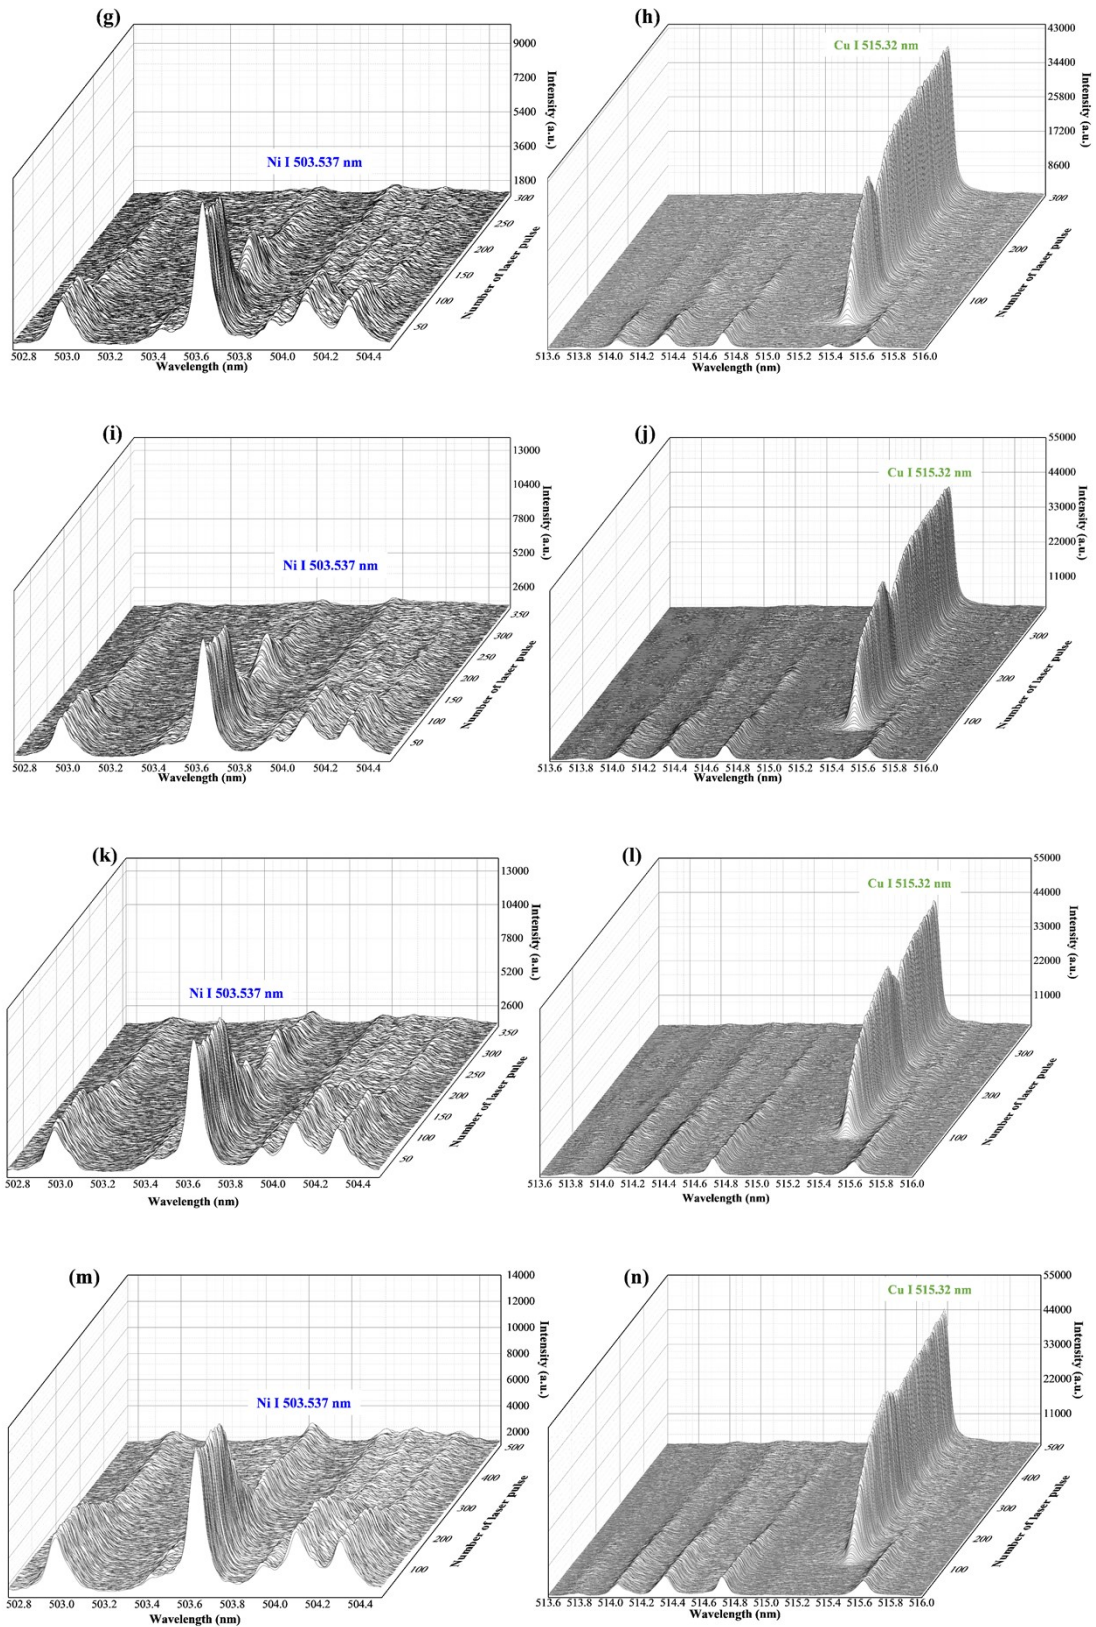

Figure S1. Typical spectra of Ni-Cu-Ni-Cu multilayer sample under different  $\Delta L$  with a laser energy of 170 mJ. (a), (b):  $\Delta L = 0$  cm; (c), (d):  $\Delta L = 1$  cm; (e), (f):  $\Delta L = 3$  cm; (g), (h):  $\Delta L = 4$  cm; (i), (j):  $\Delta L = 5$  cm; (k), (l):  $\Delta L = 6$  cm; (m), (n):  $\Delta L = 7$  cm.

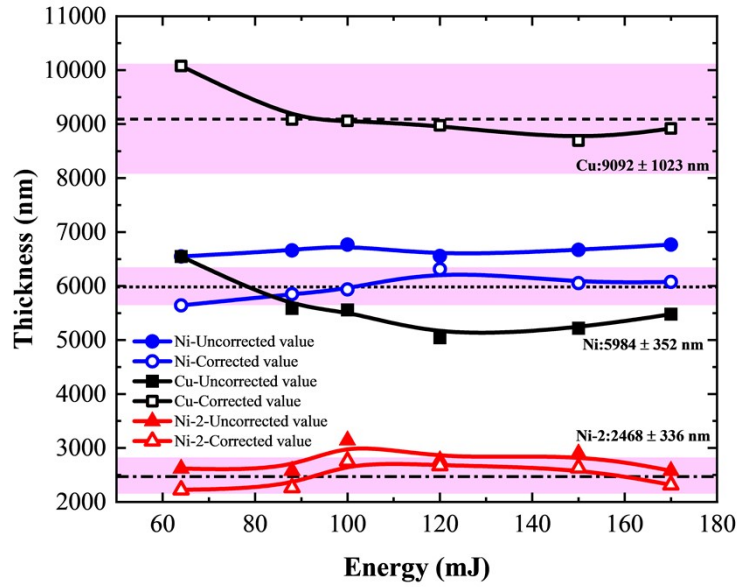

Figure S2. Layer thickness results before and after correction with different laser pulse energies. (The SEM values for each layer thickness were also presented in the figure, and shadow areas were used to indicate the layer thicknesses with the error ranges for Ni layer, Cu layer and Ni-2 layer, respectively.)

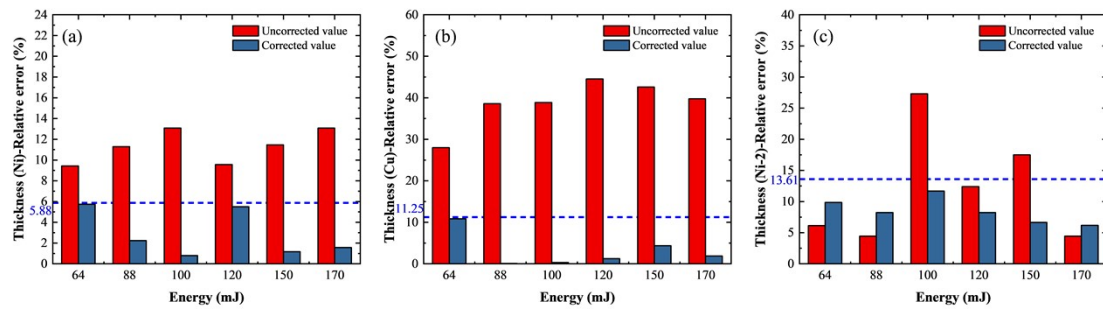

Figure S3. Comparison of the relative errors of the layer thickness before and after correction for different laser pulse energies, (a) Ni layer, (b) Cu layer, and (c) Ni-2 layer.
